# Supplementary material
Source: PubMed Central journal article supplement (PMC4068502)
Supplement: AAC.02410-14_zac006142893so1.pdf [file AAC.02410-14_zac006142893so1.pdf]

## SUPPLEMENTAL MATERIALS

A

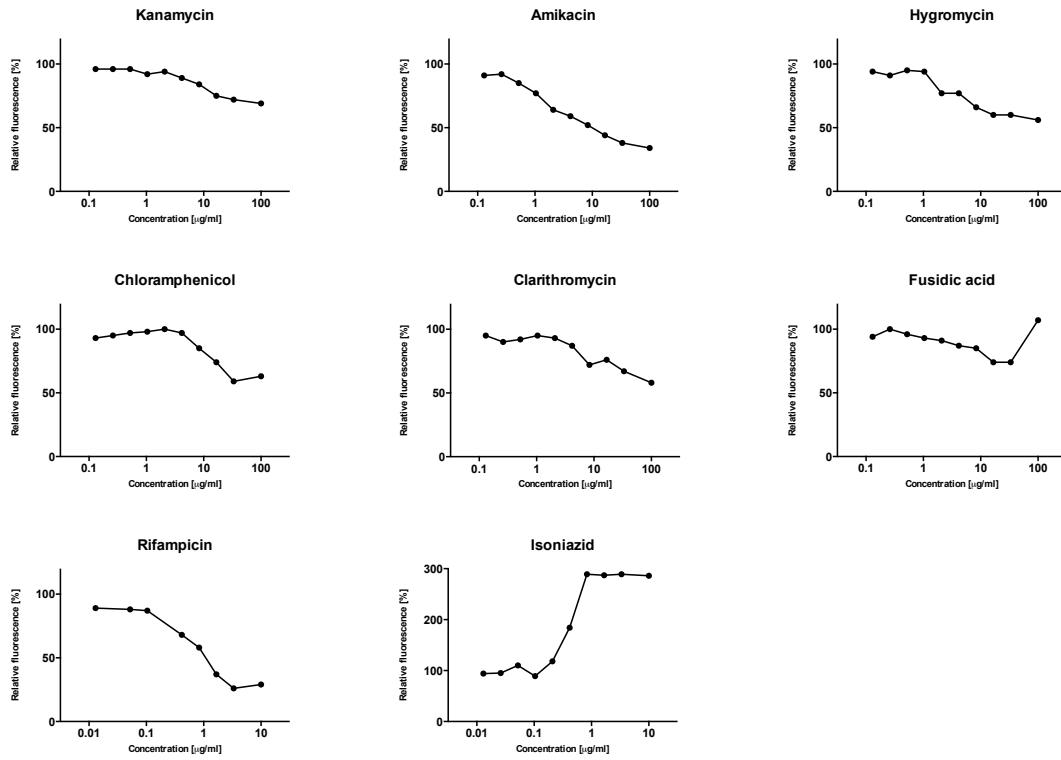

B.

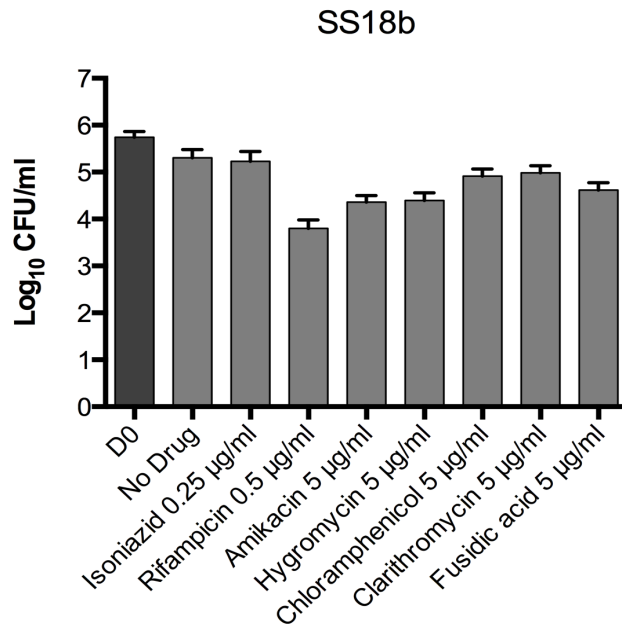

**Supplementary FIG. 1.** Activity of ribosome inhibitors against SS18b in REMA (1A) and determined by CFU (1B).

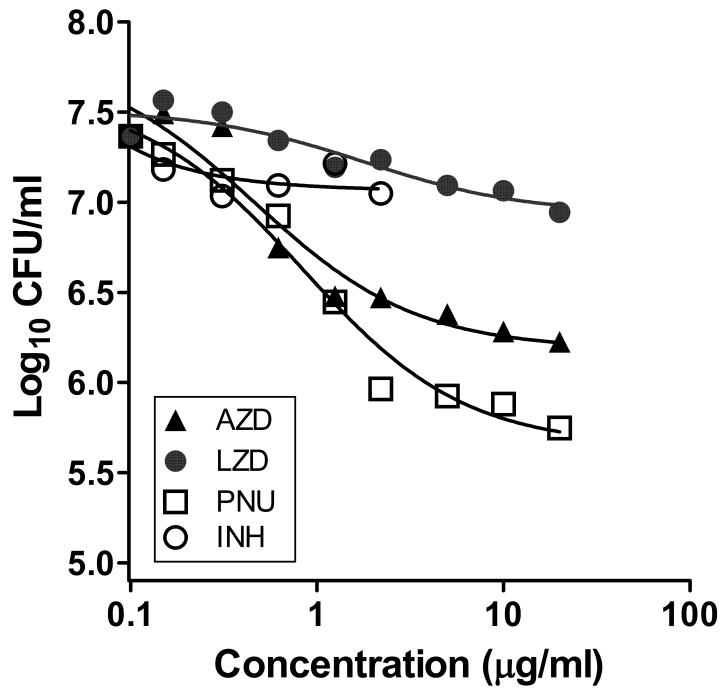

**Supplementary FIG. 2.** Bactericidal activity of three oxazolidinones against hypoxic non-replicating *M. tuberculosis*.
